# Supplementary material for: Exome sequencing study of 20 patients with high myopia
Source: PubMed Central journal article supplement (PMC6148412; doi:10.7717/peerj.5552), 2018-09-17
Supplement: peerj-06-5552-s005.pdf [file peerj-06-5552-s005.pdf]

Macular\_RPE\_choroid\_sclera  
Macular\_Retina  
Peripheral\_RPE\_choroid\_sclera  
Peripheral\_Retina

Type Count

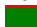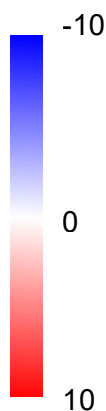

Type

- Known gene
- Ocular disease gene

Count

- 1
- 2
- 3
- 4
