# Supplementary material for: Exome sequencing study of 20 patients with high myopia
Source: PeerJ. 2018 Sep 17;6:e5552. doi: 10.7717/peerj.5552 (PMC6148412; doi:10.7717/peerj.5552)
Supplement: Supplemental Information 3 — Only GO terms with an BH adjusted FDR <0.05 were included in the table. MF, Molecular Function; BP, Biological Process; CC, Cellular Component. [file peerj-06-5552-s003.xlsx]

## Sheet: 12candidategene_MF
GO term	P-value	FDR
eye pigment precursor transporter activity	0.00069213	0.0125
phosphatidylethanolamine-translocating ATPase activity	0.0013838	0.0125
opsin binding	0.0020751	0.0125
zinc ion transmembrane transporter activity	0.002766	0.0138
microtubule minus-end binding	0.0055253	0.0193
protein phosphatase inhibitor activity	0.0089651	0.0193
neuropilin binding	0.0096518	0.0193
ATPase activity, coupled to transmembrane movement of substances	0.0131	0.0206
semaphorin receptor binding	0.0138	0.0206
chemorepellent activity	0.0165	0.0206
phosphoprotein binding	0.0206	0.0206
calcium ion binding	0.0418	0.0418

## Sheet: 709gene_MF
GO term	P-value	FDR
structural constituent of eye lens	3.4697e-11	2.1477e-08
RNA polymerase II repressing transcription factor binding	2.2083e-07	6.8237e-05
extracellular matrix structural constituent	3.83e-07	7.8898e-05
cGMP binding	2.6234e-06	0.000404
G-protein coupled photoreceptor activity	3.3319e-06	0.00040982
3',5'-cyclic-GMP phosphodiesterase activity	8.1887e-05	0.0084344
extracellular matrix structural constituent conferring tensile strength	0.00010104	0.0088916
intracellular cGMP activated cation channel activity	0.00018156	0.014
extracellular matrix constituent conferring elasticity	0.0002405	0.0164
identical protein binding	0.00030361	0.0185
BMP receptor binding	0.00046676	0.0238
intracellular cAMP activated cation channel activity	0.00046676	0.0238
gap junction channel activity	0.00069009	0.0324
retinol binding	0.0009801	0.0431
photoreceptor activity	0.0010513	0.0431
transforming growth factor beta receptor binding	0.0012681	0.0482

## Sheet: 12candidategene_BP
GO term	P-value	FDR
visual perception	0.0001134	0.0036763
photoreceptor cell maintenance	0.00012254	0.0036763
retinoid metabolic process	0.00050554	0.0080649
cellular response to zinc ion starvation	0.00067207	0.0080649
zinc II ion transmembrane import	0.00067207	0.0080649
phospholipid transfer to membrane	0.0013437	0.0134
G1 to G0 transition involved in cell differentiation	0.002015	0.0134
cilium assembly	0.0025157	0.0134
regulation of establishment of protein localization	0.0026859	0.0134
cellular zinc ion homeostasis	0.0026859	0.0134
T-helper 1 cell differentiation	0.0033564	0.0134
equilibrioception	0.0033564	0.0134
regulation of endothelial cell migration	0.0033564	0.0134
pronephros development	0.0040265	0.0141
otic vesicle formation	0.0046962	0.0141
sensory perception of light stimulus	0.0046962	0.0141
neural precursor cell proliferation	0.0060344	0.0173
phototransduction, visible light	0.0060344	0.0173
angiogenesis	0.0070406	0.0173
rhodopsin mediated signaling pathway	0.0080388	0.0173
intraciliary transport	0.0087062	0.0173
positive regulation of mRNA splicing, via spliceosome	0.0087062	0.0173
eye photoreceptor cell development	0.0093731	0.0173
phospholipid translocation	0.0093731	0.0173
hindbrain development	0.0114	0.0173
positive regulation of intracellular protein transport	0.012	0.0173
glycosaminoglycan catabolic process	0.012	0.0173
negative regulation of axon extension involved in axon guidance	0.0147	0.0173
eye development	0.0154	0.0173
glycosaminoglycan metabolic process	0.0173	0.0173
regulation of rhodopsin mediated signaling pathway	0.0173	0.0173
semaphorin-plexin signaling pathway	0.02	0.02
negative chemotaxis	0.02	0.02
glycosaminoglycan biosynthetic process	0.022	0.022
inner ear development	0.0226	0.0226
lipoprotein metabolic process	0.0226	0.0226
response to stimulus	0.0246	0.0246
lipid transport	0.0266	0.0266
neural crest cell migration	0.0272	0.0272
negative regulation of angiogenesis	0.0338	0.0338
negative regulation of catalytic activity	0.039	0.039
extracellular matrix disassembly	0.0467	0.0467
BMP signaling pathway	0.0474	0.0474
axonogenesis	0.0487	0.0487

## Sheet: 709gene_BP
GO term	P-value	FDR
photoreceptor cell maintenance	1.1102e-16	7.5051e-14
visual perception	1.1102e-16	7.5051e-14
response to stimulus	1.1102e-16	7.5051e-14
cilium assembly	1.1102e-16	7.5051e-14
sensory perception of sound	6.2894e-13	3.3963e-10
non-motile cilium assembly	2.8185e-12	1.2683e-09
retinoid metabolic process	5.7345e-12	2.2135e-09
eye development	1.8097e-11	6.1168e-09
camera-type eye development	2.3781e-11	7.1344e-09
retina development in camera-type eye	3.9278e-11	1.0605e-08
regulation of rhodopsin mediated signaling pathway	1.0392e-09	2.546e-07
detection of light stimulus involved in visual perception	2.1034e-09	4.3751e-07
rhodopsin mediated signaling pathway	2.1034e-09	4.3751e-07
melanosome transport	7.5759e-09	1.4139e-06
eye photoreceptor cell development	7.8549e-09	1.4139e-06
extracellular matrix organization	2.3094e-08	3.9029e-06
phototransduction	2.9537e-08	4.6963e-06
photoreceptor cell outer segment organization	4.6772e-08	6.8045e-06
smoothened signaling pathway	4.7919e-08	6.8045e-06
melanocyte differentiation	6.5599e-08	8.8558e-06
phototransduction, visible light	1.031e-07	1.3197e-05
sensory perception of light stimulus	4.8748e-07	5.9473e-05
melanosome organization	8.4701e-07	9.91e-05
retinal cone cell development	1.0505e-06	0.00011766
equilibrioception	2.126e-06	0.0002296
retina homeostasis	2.4708e-06	0.00025697
embryonic eye morphogenesis	3.7487e-06	0.00037487
protein localization to cilium	4.5615e-06	0.0004379
retinal rod cell development	5.1207e-06	0.00047622
retinol metabolic process	6.7403e-06	0.00060663
negative regulation of epithelial cell proliferation	8.5275e-06	0.0007366
palate development	8.769e-06	0.0007366
determination of left/right symmetry	9.429e-06	0.00076375
embryonic digit morphogenesis	1.0194e-05	0.00080529
protein localization to organelle	1.0472e-05	0.00080632
intraciliary retrograde transport	2.022e-05	0.0014761
detection of visible light	2.022e-05	0.0014761
kidney development	2.2859e-05	0.0015404
eye pigment biosynthetic process	2.2991e-05	0.0015404
retinal blood vessel morphogenesis	2.2991e-05	0.0015404
inner ear morphogenesis	3.4505e-05	0.002187
lipoprotein biosynthetic process	3.5274e-05	0.002187
melanin biosynthetic process	3.5274e-05	0.002187
heart looping	4.0784e-05	0.0024879
lens development in camera-type eye	4.5649e-05	0.002739
collagen catabolic process	4.9685e-05	0.0028817
neural tube patterning	5.4401e-05	0.0031009
endochondral ossification	7.6487e-05	0.0042832
inner ear development	7.9281e-05	0.0043605
intracellular transport	9.0169e-05	0.0048691
regulation of smoothened signaling pathway	9.7717e-05	0.005179
common-partner SMAD protein phosphorylation	0.00010934	0.0054668
mitochondrial DNA replication	0.00010934	0.0054668
lacrimal gland development	0.00010934	0.0054668
regulation of complement activation	0.00015282	0.0074881
fat cell differentiation	0.00015608	0.0074919
animal organ morphogenesis	0.00017295	0.0081286
anterograde synaptic vesicle transport	0.00019486	0.0084425
inner ear receptor stereocilium organization	0.00019486	0.0084425
intraciliary transport	0.00019486	0.0084425
lens fiber cell differentiation	0.00019486	0.0084425
collagen-activated tyrosine kinase receptor signaling pathway	0.00019634	0.0084425
transport	0.0002461	0.0103
protein localization to ciliary transition zone	0.00025541	0.0105
photoreceptor cell development	0.00025541	0.0105
vasodilation	0.00027328	0.0109
protein-chromophore linkage	0.00027328	0.0109
neural crest cell migration	0.00027917	0.0109
retinal metabolic process	0.00032467	0.0123
cellular response to light stimulus	0.00032467	0.0123
in utero embryonic development	0.00038742	0.0147
skeletal system development	0.00043352	0.016
SMAD protein signal transduction	0.00048096	0.0178
positive regulation of melanin biosynthetic process	0.00058789	0.02
vitamin transport	0.00058789	0.02
extracellular matrix-cell signaling	0.00058789	0.02
negative regulation of appetite by leptin-mediated signaling pathway	0.00058789	0.02
regulation of cell fate commitment	0.00058789	0.02
regulation of cilium beat frequency involved in ciliary motility	0.00058789	0.02
osteoblast differentiation	0.00067309	0.0222
pulmonary valve morphogenesis	0.00074484	0.0238
striatum development	0.00074484	0.0238
collagen fibril organization	0.00079456	0.0254
cell development	0.00079456	0.0254
embryonic hindlimb morphogenesis	0.00082667	0.0256
odontogenesis of dentin-containing tooth	0.0010057	0.0308
protein O-linked mannosylation	0.0010572	0.0308
left/right axis specification	0.0010572	0.0308
maintenance of protein location in nucleus	0.0010572	0.0308
negative regulation of osteoclast differentiation	0.001071	0.0308
limb development	0.001071	0.0308
semicircular canal morphogenesis	0.0011151	0.0308
axoneme assembly	0.0011151	0.0308
negative regulation of neuroblast proliferation	0.0011151	0.0308
embryonic organ morphogenesis	0.0011151	0.0308
regulation of Cdc42 protein signal transduction	0.0011151	0.0308
negative regulation of angiogenesis	0.0011391	0.0308
anterograde axonal transport	0.0013404	0.0362
protein O-linked glycosylation	0.0014093	0.0377
embryonic camera-type eye development	0.0014516	0.0377
spliceosomal tri-snRNP complex assembly	0.0014516	0.0377
chaperone-mediated protein complex assembly	0.0014516	0.0377
artery morphogenesis	0.0016567	0.0431
positive regulation of neuron differentiation	0.0016572	0.0431
response to light intensity	0.0018713	0.0446
regulation of smooth muscle cell differentiation	0.0018713	0.0446
negative regulation of type B pancreatic cell apoptotic process	0.0018713	0.0446
telencephalon regionalization	0.0018713	0.0446
proteoglycan metabolic process	0.0018713	0.0446
positive regulation of transcription from RNA polymerase II promoter	0.0018977	0.0446
digestive tract morphogenesis	0.0019385	0.0446
positive regulation of ossification	0.0019385	0.0446
retina layer formation	0.0019385	0.0446
complement activation, alternative pathway	0.0019385	0.0446
GMP metabolic process	0.0019385	0.0446
positive regulation of bone mineralization	0.0019439	0.0447
canonical Wnt signaling pathway	0.0020659	0.0475
cell-cell signaling	0.0021997	0.0484
positive regulation of epithelial cell proliferation	0.0022636	0.0498

## Sheet: 12candidategene_CC
GO term	P-value	FDR
photoreceptor outer segment	2.1112e-06	7.1782e-05
ciliary basal body	0.00094962	0.0161
gamma-tubulin complex	0.0060451	0.0414
sperm flagellum	0.0073841	0.0414
MKS complex	0.008053	0.0414
ciliary transition zone	0.0101	0.0414
stereocilium	0.0114	0.0414
photoreceptor disc membrane	0.0121	0.0414
centriolar satellite	0.0141	0.0414
photoreceptor inner segment	0.0187	0.0414
centrosome	0.0192	0.0414
photoreceptor connecting cilium	0.0207	0.0414

## Sheet: 709gene_CC
GO term	P-value	FDR
photoreceptor outer segment	1.1102e-16	1.1324e-14
cilium	1.1102e-16	1.1324e-14
ciliary basal body	1.1102e-16	1.1324e-14
photoreceptor connecting cilium	1.1102e-16	1.1324e-14
photoreceptor inner segment	6.728e-14	5.5169e-12
centrosome	1.5236e-11	1.0361e-09
MKS complex	9.3584e-11	5.4279e-09
BBSome	1.6841e-10	8.5889e-09
photoreceptor disc membrane	2.7543e-10	1.2394e-08
axoneme	6.7641e-10	2.7733e-08
ciliary transition zone	7.8465e-10	2.9032e-08
photoreceptor outer segment membrane	9.5617e-10	3.251e-08
ciliary membrane	3.3594e-09	1.0414e-07
ciliary tip	4.8187e-08	1.3974e-06
centriole	1.2464e-07	3.3652e-06
endoplasmic reticulum lumen	2.5023e-07	6.2557e-06
motile cilium	4.5798e-07	1.0992e-05
stereocilium	5.3612e-07	1.1795e-05
basement membrane	8.2377e-07	1.7299e-05
extracellular matrix	1.2049e-06	2.4099e-05
extracellular region	1.6866e-06	3.2044e-05
melanosome membrane	6.2575e-06	0.00011263
proteinaceous extracellular matrix	7.5045e-06	0.00012758
intraciliary transport particle A	1.9781e-05	0.00033628
extracellular space	2.6439e-05	0.00042303
intraciliary transport particle B	9.5298e-05	0.0014295
collagen type IV trimer	0.00010742	0.0016114
centriolar satellite	0.00021767	0.0030474
transmembrane transporter complex	0.00025199	0.0035279
axon cytoplasm	0.00097178	0.0126
gamma DNA polymerase complex	0.0029526	0.0354
BLOC-3 complex	0.0029526	0.0354
collagen type XI trimer	0.0029526	0.0354
sperm principal piece	0.0031777	0.0381
